# Supplementary material for: Mechanism of C-terminal intein cleavage in protein splicing from QM/MM molecular dynamics simulations
Source: Royal Society of Chemistry journal article supplement (doi:10.1039/c1ob06444d), 2011-11-03
Supplement: c1ob06444d.pdf [file c1ob06444d.pdf]

## Electronic Supplementary Information

### Mechanism of C-terminal intein cleavage in protein splicing from QM/MM molecular dynamics simulations

Jon I. Mujika<sup>\*a</sup> Xabier Lopez<sup>a</sup> and Adrian J. Mulholland<sup>b</sup>

<sup>a</sup> Kimika Fakultatea, Euskal Herriko Unibertsitatea and Donostia International Physics Center (DIPC, P. K. 1072, 20080 Donostia, Euskadi (Spain))

<sup>b</sup> Centre for Computational Chemistry, School of Chemistry, University of Bristol, Bristol BS8 1TS, UK

**Table S1** Protein atoms within the buffer region are restrained harmonically to their crystallographic positions by applying scaled restraints. Four different slices (from 21 Å to 25 Å with respect to the system center, the C<sup>198</sup> atom) and different atom types (backbone atoms (N, C<sub>α</sub>, C and O), β atoms, γ atoms and remaining atoms) are considered in order to define the force constants of the restraints.

| Buffer region | Backbone atoms | β atoms | γ atoms | Others |
|---------------|----------------|---------|---------|--------|
| 21-22 Å       | 0.27           | 0.24    | 0.23    | 0.22   |
| 22-23 Å       | 0.85           | 0.78    | 0.73    | 0.69   |
| 23-24 Å       | 1.44           | 1.31    | 1.22    | 1.18   |
| 24-25 Å       | 1.70           | 1.55    | 1.45    | 1.40   |

**Table S2** Potential energy surface (in kcal/mol) for the reaction pathway illustrated in Figure 4 computed with SCCDFTB/CHARMM27 level of theory. Single point calculations were carried out treating the QM part at B3LYP/6-31+G(d) level of theory.

|                      | SCCDFTB |      |      | B3LYP/6-31+G(d) |      |      |
|----------------------|---------|------|------|-----------------|------|------|
|                      | QM/MM   | QM   | MM   | QM/MM           | QM   | MM   |
| React                | 0.0     | 0.0  | 0.0  | 0.0             | 0.0  | 0.0  |
| TS1                  | 16.2    | 10.8 | 5.4  | 24.2            | 14.0 | 10.2 |
| React <sub>act</sub> | 15.6    | 3.6  | 12.0 | 23.2            | 11.6 | 11.6 |
| TS2                  | 21.5    | 1.4  | 20.1 | 33.3            | 18.0 | 15.3 |
| Int                  | 18.2    | -2.5 | 20.7 | 28.0            | 4.9  | 23.1 |

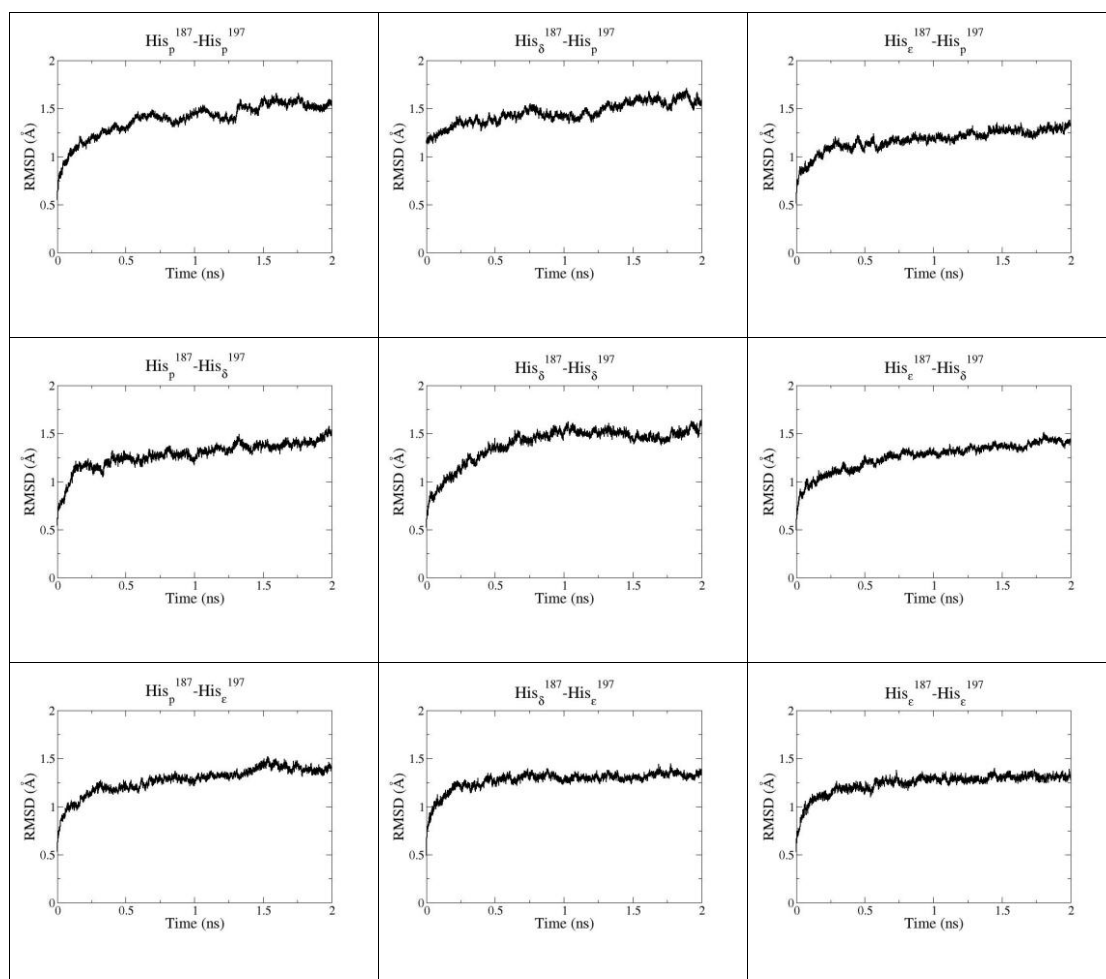

Figure S1 Root mean squared deviation (RMSD) along the 2ns production of the nine simulations. The RMSD was computed as the deviation of all intein atoms from their position in the 1AM2 crystal structure.

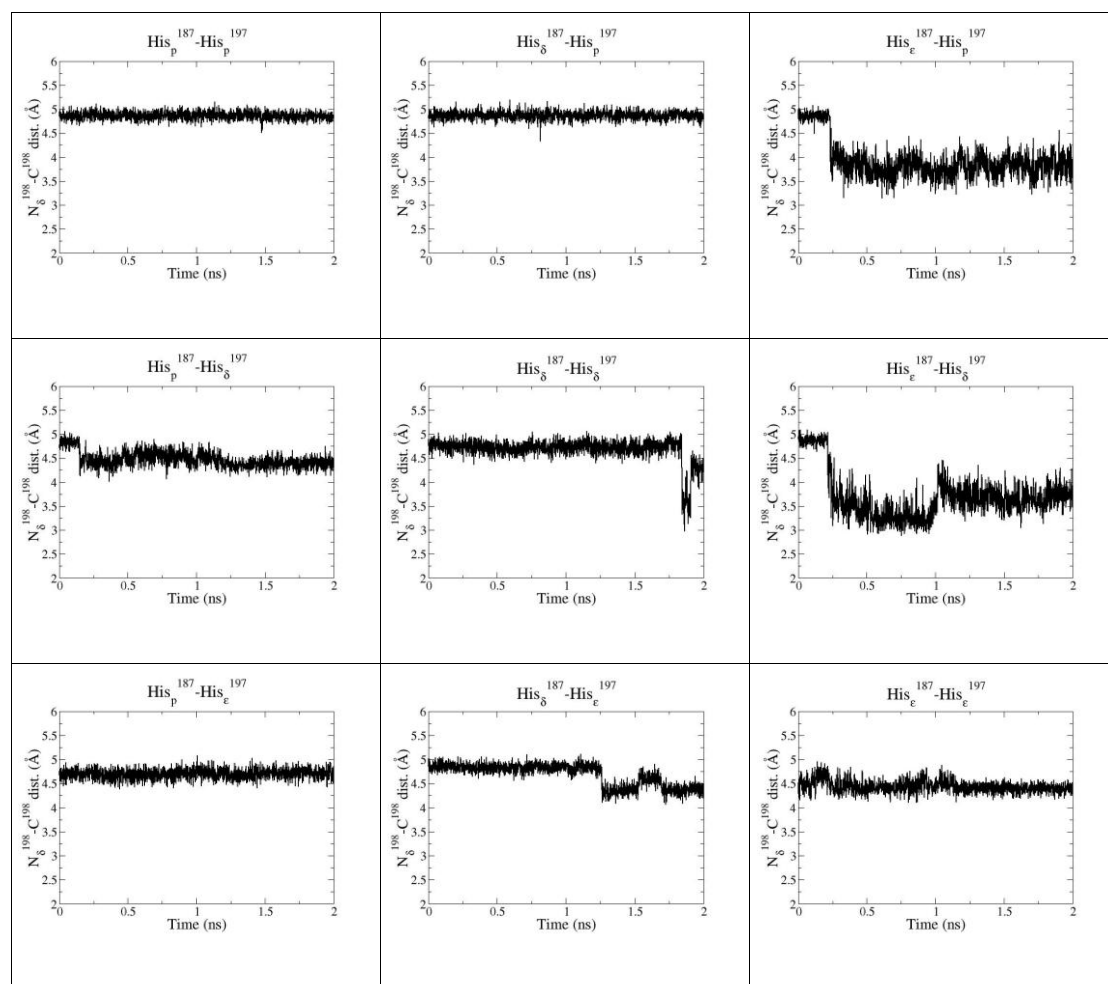

Figure S2  $N_{\delta}^{198}-C^{198}$  distance along the nine simulations.

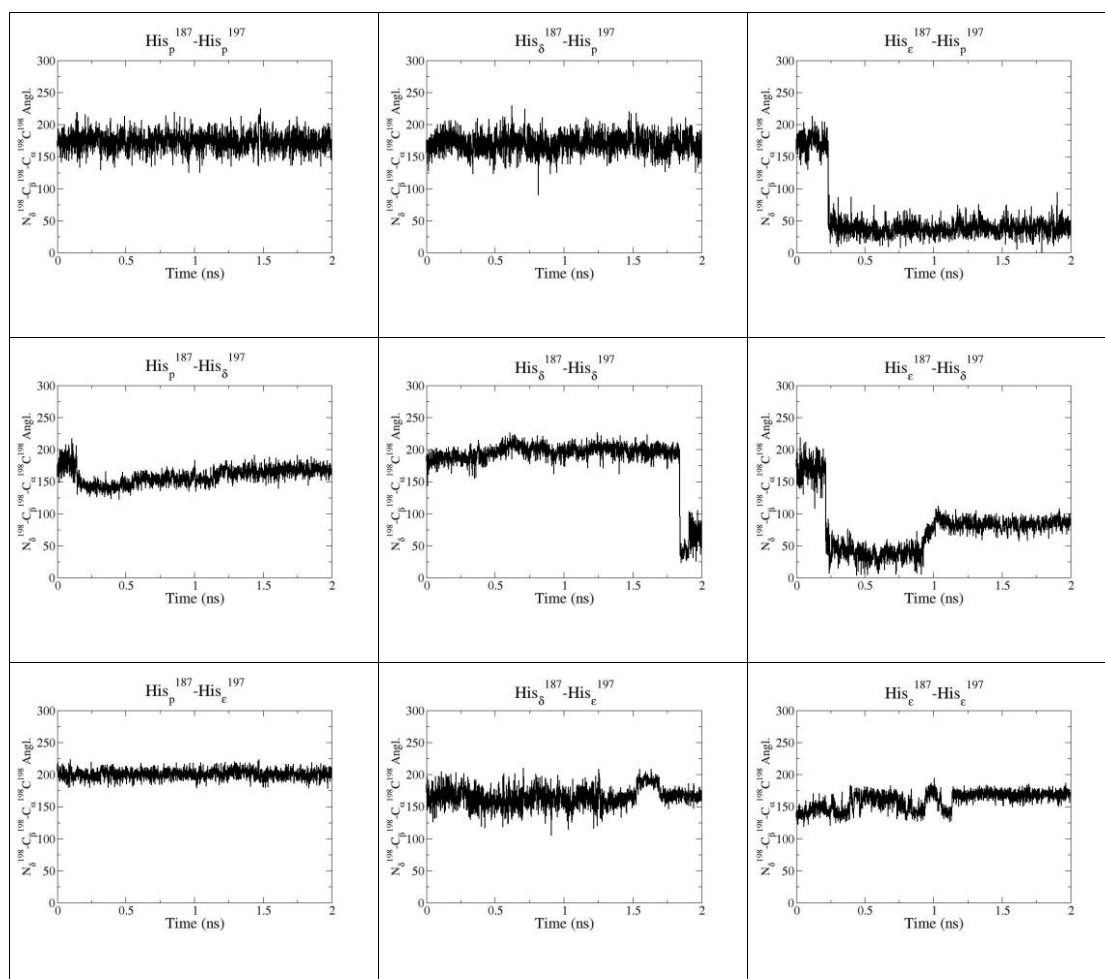

Figure S3  $N_{\delta}^{198}-C_{\beta}^{198}-C_{\gamma}^{198}-C^{198}$  dihedral angle along the nine simulations.

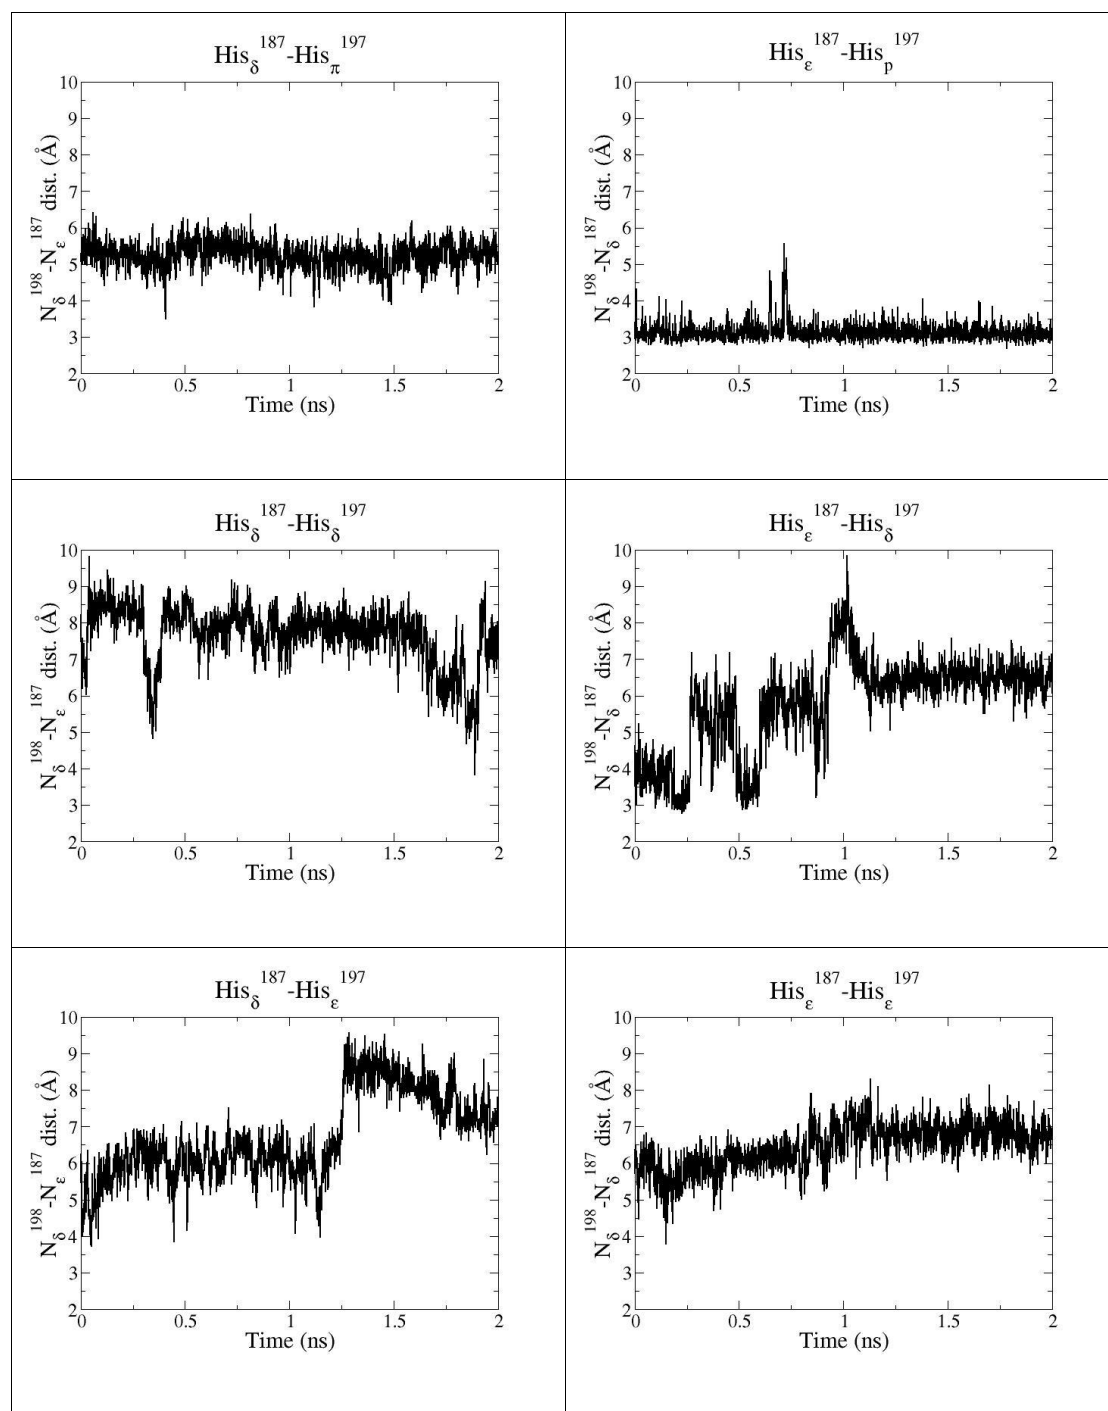

Figure S4  $\text{N}_\delta^{198}-\text{N}_\epsilon^{187}$  distance along the nine simulations.

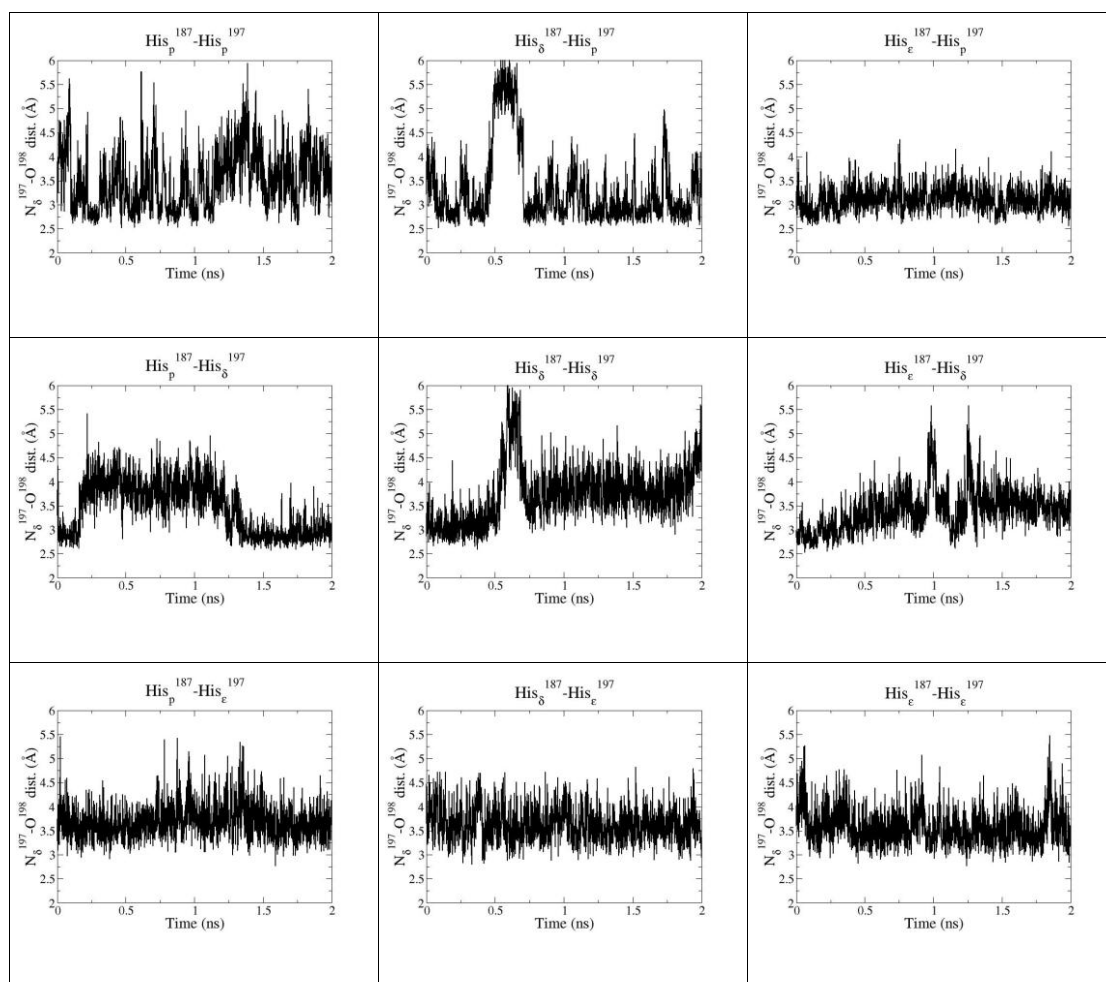

Figure S5  $\text{N}_\delta^{197}-\text{O}^{198}$  distance along the nine simulations.

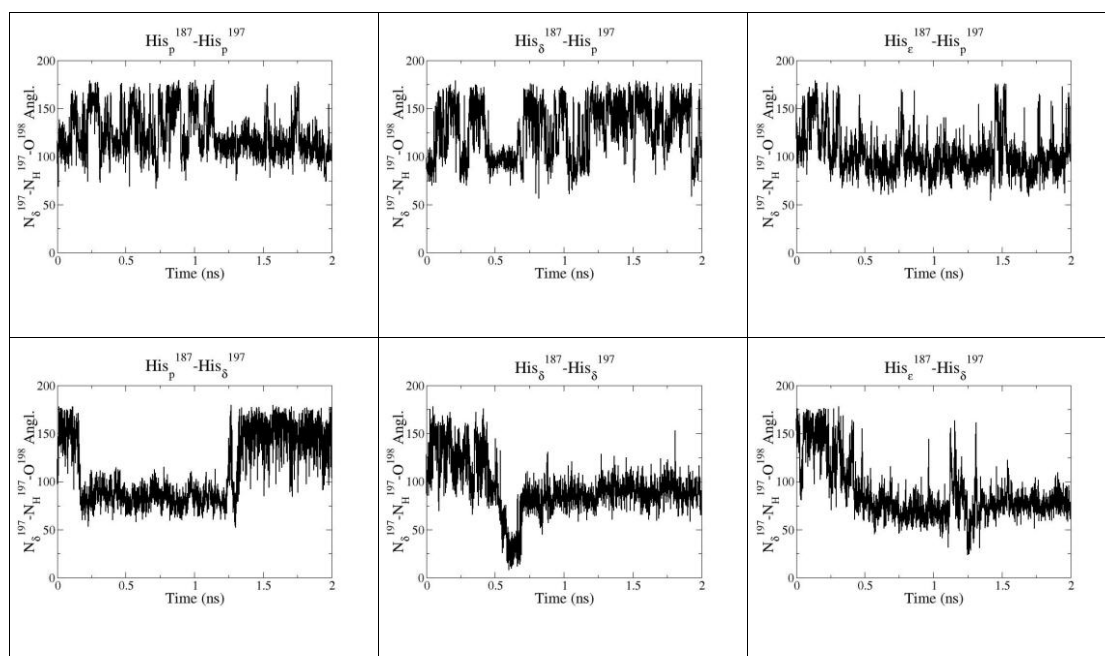

Figure S6  $N_{\delta}^{197}$ - $H_{\delta}^{197}$ - $O^{198}$  angle along six MD simulations where  $N_{\delta}^{197}$  is unprotonated.

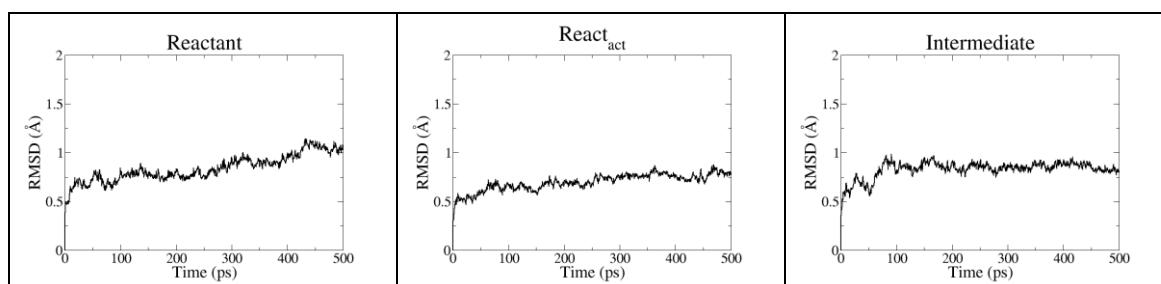

Figure S7 Root mean squared deviation (RMSD) along the 500 ps production of the SCCDFTB/CHARMM27 MD simulations for the initial reactant, activated reactant and intermediate. The RMSD was computed as the deviation of all intein atoms from the initial geometry, the last structure of the umbrella sampling window associated with the corresponding stationary point.

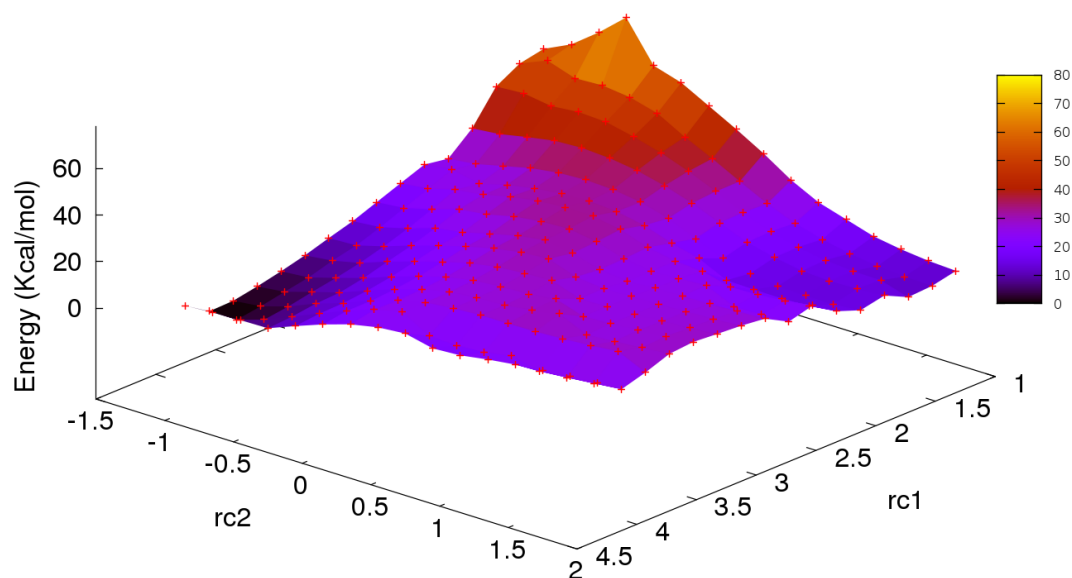

Figure S8 Potential energy surface characterized defining two reaction coordinates: i)  $rc_1$ , the distance between the  $N_{\delta}^{198}$  and  $C^{198}$  atoms and ii)  $rc_2$ , antisymmetric combination of two distances:  $d_1$  ( $N_{\delta}^{198}-H_{\delta}^{198}$ ) and  $d_2$  ( $N_{\delta}^{187}-H_{\delta}^{198}$ ). The minimum energy reaction pathway goes through a stepwise mechanism in which first the proton is transferred from Asn198 side chain to His187, followed by the cyclization of Asn198 to reach the intermediate. Based on these results, the free energy profile was characterized following the stepwise mechanism and defining a single reaction coordinate at each step (see main body text).
